# Supplementary material
Source: PubMed Central journal article supplement (PMC2715526)
Supplement: 0904191106_0904191106SI.pdf [file 0904191106_0904191106SI.pdf]

# Supporting Information

Chennamsetty et al. 10.1073/pnas.09041911106

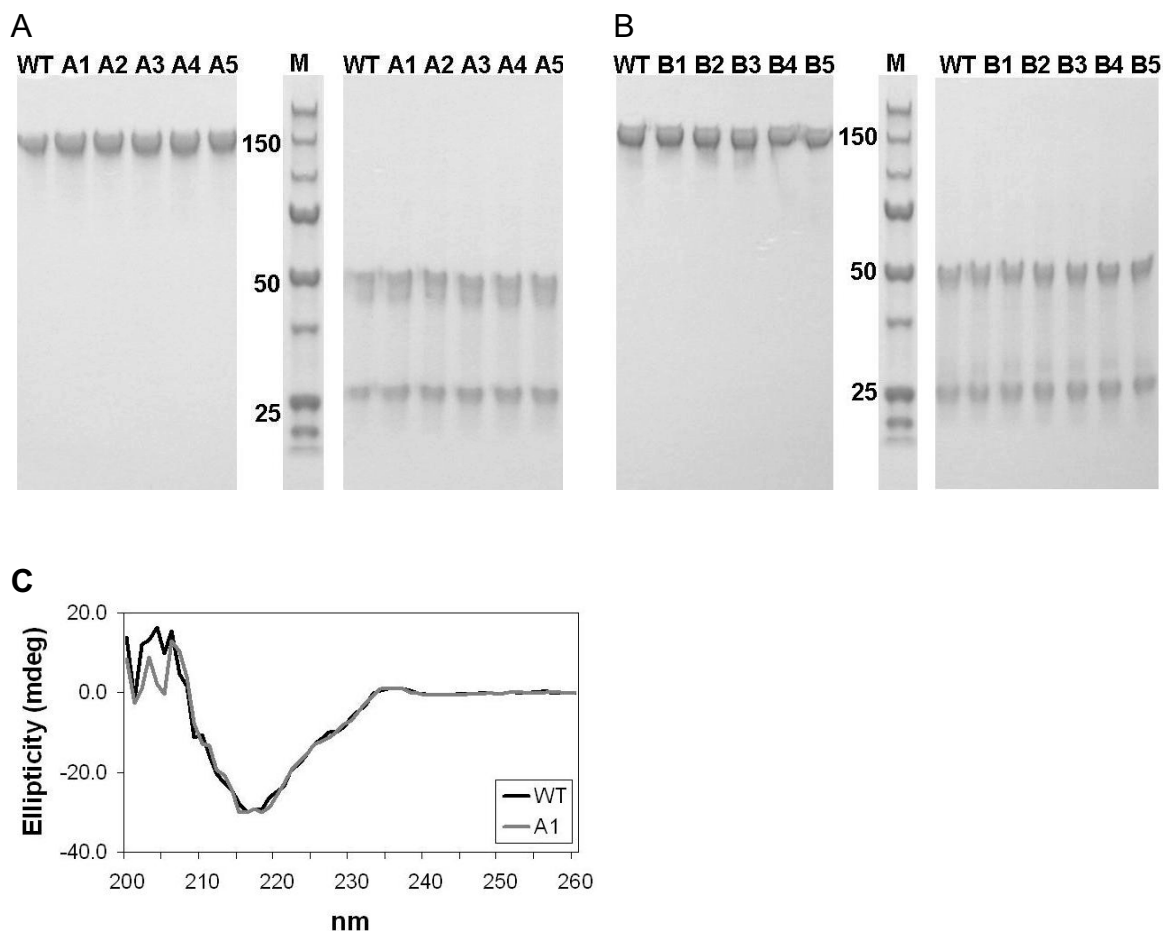

**Fig. S1.** Quality control of engineered variants. (A) Comparison of antibody A Variants A1-A5 to antibody A WT by SDS/PAGE under nonreducing (left) and reducing (right) conditions. The bands in the marker lane M that correspond to 150, 50, and 25 kDa are indicated. (B) Comparison of antibody B Variants B1-B5 to antibody B WT by SDS/PAGE under nonreducing (left) and reducing (right) conditions. (C) Circular dichroism spectra of antibody A WT and Variant A1. This overlapped pattern shows that the secondary structure is intact upon mutation.

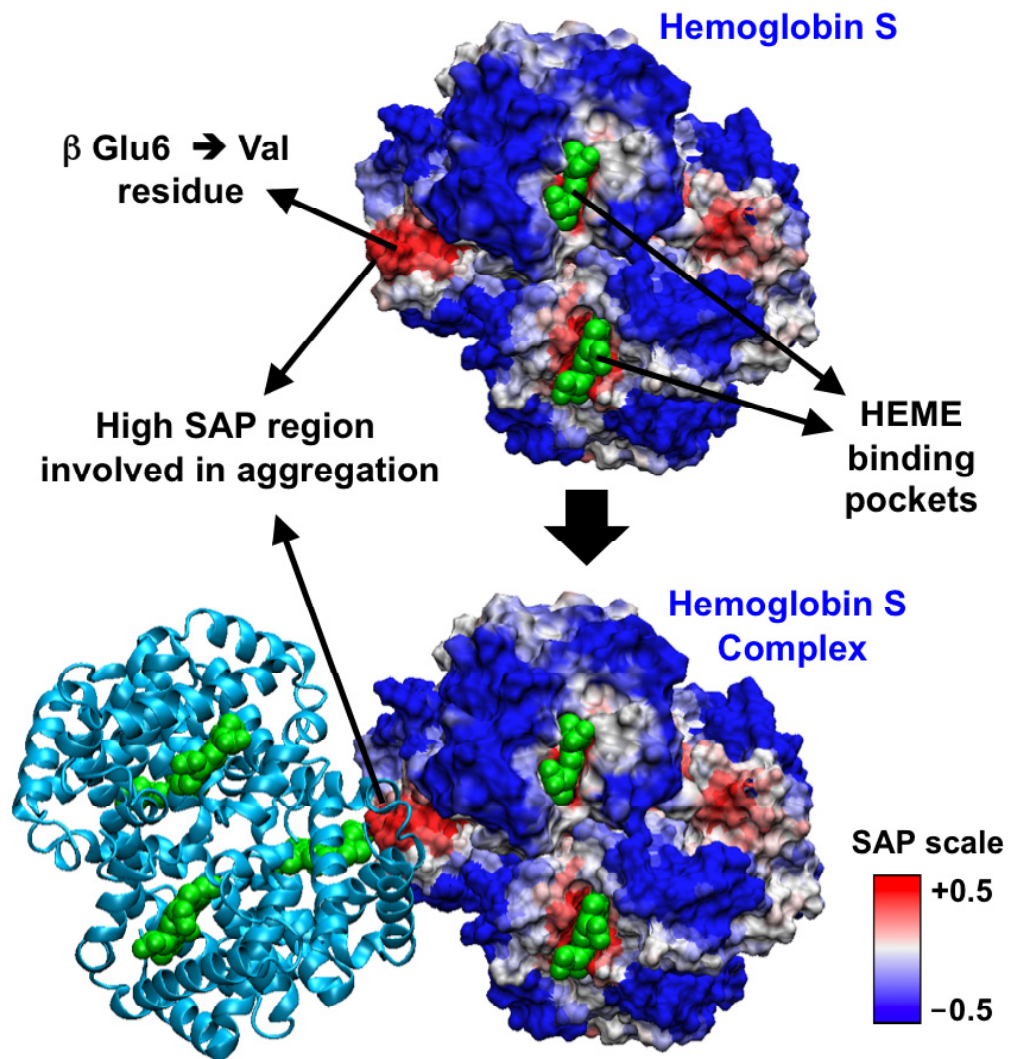

Fig. S2. The SAP analysis at  $R = 10 \text{ \AA}$  for deoxyhemoglobin S, along with the structure of the aggregated complex (PDB entry 2HBS). The high SAP region that includes the  $\beta$ -Glu-6 to Val mutation is also marked.

**Table S1. Antigen binding activity of antibody-A wild type and variants**

| Sample | Content, mg/mL | Relative potency, % |            | Mean potency % |
|--------|----------------|---------------------|------------|----------------|
|        |                | Dilution 1          | Dilution 2 |                |
| WT1    | 1              | 103.6               | 102.8      | 103            |
| WT2    | 1              | 83.4                | 84.1       | 84             |
| A1     | 1              | 85.0                | 75.7       | 80             |
| A2     | 1              | 89.9                | 87.9       | 89             |
| A3     | 1              | 83.1                | 82.1       | 83             |
| A4     | 1              | 86.6                | 86.5       | 87             |
| A5     | 1              | 87.3                | 86.9       | 87             |

The antigen binding activity is measured in a cell-based gene-reporter bioassay. All values of potency are relative to wild type standards. WT1 and WT2 represent two different preparations along with the corresponding variants, independently of the original standards.

**Table S2. The antigen binding activity\* of antibody-B wild type and variants.**

| Sample | Relative potency, % |
|--------|---------------------|
| WT1    | 92                  |
| WT2    | 90                  |
| B1     | <10                 |
| B2     | <10                 |
| B3     | 99                  |
| B4     | <10                 |
| B5     | <10                 |

See [Table S1](#) for details.
